# Supplementary material for: Klasse gegen Klima? Transformationskonflikte in der Autoindustrie
Source: Springer Nature journal article supplement (doi:10.1007/s11609-023-00514-z), 2023-12-20
Supplement: MOESM1 [file 26554006]

**Tabelle 1:** Zuordnungskriterien des Klassenmodells (Quelle: Eigene Darstellung)

| <i>Verwendete Variablen</i>                            | Berufsbezeichnung; Beruflicher Status; Führungsposition; Anzahl direkt Untergebener; Anzahl Beschäftigte; monatliches Bruttoeinkommen; atypische Beschäftigung (Befristung, Teilzeit, Leiharbeit); Arbeitsstunden pro Woche                                                                                                                                                                                                                                                                                             |
|--------------------------------------------------------|-------------------------------------------------------------------------------------------------------------------------------------------------------------------------------------------------------------------------------------------------------------------------------------------------------------------------------------------------------------------------------------------------------------------------------------------------------------------------------------------------------------------------|
| <i>Grundgesamtheit</i>                                 | Im Originaldatensatz: Erwerbstätige Personen in Deutschland, die mindestens 15 Jahre alt sind und mehr als 10h pro Woche arbeiten; Für eine einheitliche Grundgesamtheit im erweiterten Modell wurden Personen im Alter von über 64 Jahre herausgefiltert; Erweitertes Modell inklusive der Unteren Klasse und ausschließlich geringfügig Erwerbstätigen: Personen in Deutschland im erwerbsfähigen Alter (15 bis 64 Jahre)                                                                                             |
| <i>Fallzahl</i>                                        | 19.381                                                                                                                                                                                                                                                                                                                                                                                                                                                                                                                  |
| <b>Klasse</b>                                          | <b>Erfasste Personengruppen</b>                                                                                                                                                                                                                                                                                                                                                                                                                                                                                         |
| <i>Herrschende Klasse</i>                              | Personen in Berufen, aus deren Berufsbezeichnung hervorgeht, dass sie über Kontrollmacht, die zu Letztentscheidungen befähigt, verfügen (Führungskräfte Gesetzgebung/Verwaltung); Lohnabhängige, die sich in einer Führungsposition befinden und für mehr als 250 Mitarbeiter:innen die direkten Vorgesetzten sind; Selbstständige in Führungsposition mit einem Unternehmen mit mehr als 50 Beschäftigten                                                                                                              |
| <i>Selbstständige Mittelklasse</i>                     | Selbstständige, Freiberufliche und freie Mitarbeiter:innen mit einem Unternehmen mit weniger als 50 Beschäftigten                                                                                                                                                                                                                                                                                                                                                                                                       |
| <i>Exklusionsbereich Selbstständige Mittelklasse</i>   | Personen der Selbstständigen Mittelklasse, die ein monatliches Bruttoeinkommen von weniger als 2/3 des Medians von 2018 haben; Personen der Selbstständigen Mittelklasse, die bis zu 20h pro Woche arbeiten                                                                                                                                                                                                                                                                                                             |
| <i>Lohnabhängige Mittelklasse</i>                      | Personen, deren Berufsbezeichnung mit einer Führungsposition verbunden ist (bspw. Führungskräfte, Groß-/Einzelhandel); Personen, deren Status dem der der Neuen Arbeiterklasse oder der Konventionellen Arbeiterklasse ähnelt, die jedoch für bis zu 249 Personen die direkten Vorgesetzten sind                                                                                                                                                                                                                        |
| <i>Exklusionsbereich Lohnabhängige Mittelklasse</i>    | Personen der Lohnabhängigen Mittelklasse, die ein monatliches Bruttoeinkommen von weniger als 2/3 des Medians von 2018 haben; Personen der Lohnabhängigen Mittelklasse, die atypisch beschäftigt sind und/oder bis zu 20h pro Woche erwerbstätig sind                                                                                                                                                                                                                                                                   |
| <i>Neue Arbeiterklasse</i>                             | Personen, aus deren Berufsbezeichnung ein akademischer Abschluss, aber keine Führungsposition hervorgeht (bspw. Biowissenschaftler:in)                                                                                                                                                                                                                                                                                                                                                                                  |
| <i>Exklusionsbereich Neue Arbeiterklasse</i>           | Personen der Neuen Arbeiterklasse, die ein monatliches Bruttoeinkommen von weniger als 2/3 des Medians von 2018 haben; Personen der Neuen Arbeiterklasse, die atypisch beschäftigt sind                                                                                                                                                                                                                                                                                                                                 |
| <i>Konventionelle Arbeiterklasse</i>                   | Personen, aus deren Berufsbezeichnung weder ein akademischer Abschluss noch eine Führungsposition hervorgeht (bspw. Kassierer:innen)                                                                                                                                                                                                                                                                                                                                                                                    |
| <i>Exklusionsbereich Konventionelle Arbeiterklasse</i> | Personen der Konventionellen Arbeiterklasse, die ein monatliches Bruttoeinkommen von weniger als 2/3 des Medians von 2018 haben; Personen der Konventionellen Arbeiterklasse, die atypisch beschäftigt sind und/oder bis zu 20h pro Woche arbeiten                                                                                                                                                                                                                                                                      |
| <i>Untere Klasse</i>                                   | Konnte mit BIBB/BAuA nicht erfasst werden und wurde daher recherchiert: Obdachlose (ca. 41.000 laut BAGW 2019, von denen schätzungsweise 80% im erwerbsfähigen Alter sind), Papierlose (ca. 180.000 bis 520.000 im Jahr 2014 laut PKS [Vogel 2016], hier wurde mit 400.000 gerechnet); Erwerbslose Personen, die in Armut leben (laut Armutsbericht des Paritätischen Gesamtverbandes [2021] 57,4% im Jahr 2018, bei 2,34 Mio. Arbeitslosen im Jahr 2018 [Destatis 2023] ergibt das ca. 1,34 Mio. Erwerbslose in Armut) |
| <i>Ausschließlich geringfügig Erwerbstätige</i>        | Konnte mit BIBB/BAuA nicht erfasst werden und wurde daher recherchiert mit Daten der Agentur für Arbeit (BA 2023); umfasst Personen, die ausschließlich einer geringfügigen Erwerbstätigkeit nachgehen und diese nicht etwa im Nebenjob ausführen                                                                                                                                                                                                                                                                       |

## Literatur

- Bundesagentur für Arbeit (BA) (2023). Datenbanken Beschäftigungsstatistik. <https://statistik.arbeitsagentur.de/DE/Navigation/Statistiken/Interaktive-Statistiken/Datenbanken/Datenbanken-BST-Nav.htm>. Zugriffen: Nov. 2023.
- Bundesarbeitsgemeinschaft Wohnungslosenhilfe e.V. (BAGW) (2019). Wohnungslosigkeit: Kein Ende in Sicht [Pressemitteilung]. [https://www.bagw.de/fileadmin/bagw/media/Doc/PRM/PRM\\_2019\\_11\\_11\\_Schaetzung\\_Zahl\\_der\\_Wohnungslosen.pdf](https://www.bagw.de/fileadmin/bagw/media/Doc/PRM/PRM_2019_11_11_Schaetzung_Zahl_der_Wohnungslosen.pdf). Zugriffen: Nov. 2023.
- Der Paritätische Gesamtverband (Hrsg.). (2021). Armut in der Pandemie. Der Paritätische Armutsbericht 2021. <https://www.der-paritaetische.de/themen/sozial-und-europapolitik/armut-und-grundsicherung/armutsbericht-2021/armutsberichte-von-1989-bis-heute/>. Zugriffen: Nov. 2023.
- Statistisches Bundesamt (Destatis) (2023). Konjunkturindikatoren. Registrierte Arbeitslose und Arbeitslosenquote nach Gebietsstand. <https://www.destatis.de/DE/Themen/Wirtschaft/Konjunkturindikatoren/Lange-Reihen/Arbeitsmarkt/lrarb003ga.html>. Zugriffen: Nov. 2023.
- Vogel, D. (2016). Kurzdossier: Umfang und Entwicklung der Zahl der Papierlosen in Deutschland. Fachbereich 12. Arbeitsbereich Interkulturelle Bildung. AbIB-Arbeitspapier 2/2016. [https://www.uni-bremen.de/fileadmin/user\\_upload/fachbereiche/fb12/fb12/Interkulturelle\\_Bildung/Arbeitspapiere/VogelDita\\_Kurzdossier\\_Umfang\\_Papierlose\\_in\\_Deutschland\\_Abib-Arbeitspapier\\_2.pdf](https://www.uni-bremen.de/fileadmin/user_upload/fachbereiche/fb12/fb12/Interkulturelle_Bildung/Arbeitspapiere/VogelDita_Kurzdossier_Umfang_Papierlose_in_Deutschland_Abib-Arbeitspapier_2.pdf). Zugriffen: Nov. 2023.

**Tabelle 2:** Übersicht der Interviews nach Statusgruppen (n = 118; zzgl. vier Gruppeninterviews mit n= 32)  
(Quelle: Eigene Darstellung)

| Erhebung nach Statusgruppen                       | VW Kassel-Baunatal | Opel Eisenach | Gesamt     |
|---------------------------------------------------|--------------------|---------------|------------|
| Arbeiter:innen                                    | 21                 | 15            | 36         |
| Leiharbeiter:innen                                | 5                  | 4             | 9          |
| Werkleitung, Stab, (Unter-)Abteilungsleiter:innen | 12                 | 4             | 16         |
| Angestellte, Meister:innen                        | 13                 | 10            | 23         |
| freigestellte Betriebsräte/Vertrauenskörper       | 12                 | 5             | 17         |
| Auszubildende/Dual Studierende                    | 7                  | 0             | 7          |
| Expert:innen                                      | 6                  | 4             | 10         |
| <b>Gesamt</b>                                     | <b>76</b>          | <b>42</b>     | <b>118</b> |

**Tabelle 3:** Übersicht der Interviewten nach Klassenzugehörigkeit (n = 109; ohne Mehrfachnennungen und ohne branchenexterne Expert:innen) (Quelle: Eigene Darstellung)

| Erhebung nach Klassenzugehörigkeit  | VW Kassel-Baunatal | Opel Eisenach | Gesamt     |
|-------------------------------------|--------------------|---------------|------------|
| Herrschende Klasse (HK)             | 6                  | 2             | 8          |
| Lohnabhängige Mittelklasse (LMK)    | 22                 | 10            | 32         |
| Neue Arbeiterklasse (NAK)           | 7                  | 11            | 18         |
| Konventionelle Arbeiterklasse (KAK) | 28                 | 14            | 42         |
| Exklusionsbereich KAK               | 5                  | 4             | 9          |
| <b>Gesamt</b>                       | <b>68</b>          | <b>41</b>     | <b>109</b> |
